# Supplementary material for: Influence of Uranium on Bacterial Communities: A Comparison of Natural Uranium-Rich Soils with Controls
Source: PubMed Central journal article supplement (PMC3187815; doi:10.1371/journal.pone.0025771), 2011-10-05
Supplement: pone.0025771.s003.pdf [file pone.0025771.s003.pdf]

| DGGE band                         | Closest relatives (Silva 104) |                  |                     |                              | Number of neighbours >95% in EMBL database |           |    |
|-----------------------------------|-------------------------------|------------------|---------------------|------------------------------|--------------------------------------------|-----------|----|
|                                   | similarity (%)                | Accession number | Taxonomy            |                              | with uranium                               | with iron |    |
| B14_U07_19                        | 89.4                          | FJ562188         | Alphaproteobacteria | Caulobacteraceae             | uncultured bacterium                       | -         | -  |
| B4_U09_05                         | 99.8                          | GQ264175         | Alphaproteobacteria | Caulobacteraceae             | uncultured bacterium                       | 8         | 2  |
| B55_U06_13; 18; B55_U09_04        | 99.6                          | HQ190844         | Alphaproteobacteria | Caulobacteraceae             | Brevundilonas sp. XU-412                   | 12        | 5  |
| B5_U07_10                         | 89.3                          | EF018853         | Alphaproteobacteria | DUNssu371                    | uncultured bacterium                       | -         | -  |
| B55_U06_03                        | 97.9                          | AY913367         | Alphaproteobacteria | alpal cluster                | uncultured forest soil bacterium           | -         | 1  |
| B4_U07_EA                         | 100                           | AF200695         | Alphaproteobacteria | Bradyrhizobiaceae            | uncultured bacterium                       | 2         | 2  |
| B4_U09_06; 17                     | 99.8-99.4                     | X70405           | Alphaproteobacteria | Bradyrhizobiaceae            | Bradyrhizobium sp.                         | 19        | 22 |
| B4_U09_11                         | 99.6                          | EF018651         | Alphaproteobacteria | Hypnomicrobiaceae            | uncultured bacterium                       | -         | -  |
| B5_U07_19                         | 93.9                          | EU861871         | Alphaproteobacteria | Rhizobiaceae                 | uncultured soil bacterium                  | -         | -  |
| B38_U07_01                        | 99.2                          | DQ017938         | Alphaproteobacteria | Xanthobacteraceae            | uncultured bacterium                       | 20        | 8  |
| B55_U09_12;16; B55_U06_19         | 99.2-98.5                     | FR687460         | Alphaproteobacteria | Xanthobacteraceae            | uncultured bacterium                       | 26        | 11 |
| B55_U06_09                        | 100                           | FJ625375         | Alphaproteobacteria | Acetobacteraceae             | uncultured bacterium                       | -         | 2  |
| B5_U07_2c                         | 91.6                          | EU133522         | Alphaproteobacteria | Rhodospirillaceae            | uncultured bacterium                       | -         | -  |
| B14_U07_02; B4_U09_12             | 95.8-80                       | GU183619         | Alphaproteobacteria | wr0007                       | uncultured bacterium                       | -         | -  |
| B5_U07_13                         | 91.6                          | EU440717         | Alphaproteobacteria | Sphingomonadaceae            | uncultured Kaistobacter sp.                | -         | -  |
| B68_U09_14                        | 99.8                          | FJ382763         | Alphaproteobacteria | Sphingomonadaceae            | uncultured bacterium                       | 22        | 4  |
| B4_U07_E17                        | 96.5                          | GU134925         | Betaproteobacteria  | Burkholderiaceae             | bact. enrichment culture clone SBIB10      | 2         | 3  |
| B68_U09_10                        | 100                           | HM480181         | Betaproteobacteria  | Comamonadaceae               | uncultured beta proteobacterium            | 3         | 19 |
| B55_U06_08                        | 99.6                          | EU705175         | Betaproteobacteria  | Comamonadaceae               | uncultured Acidovorax sp.                  | 10        | 61 |
| B4_U07_e4                         | 92.9                          | DQ490985         | Betaproteobacteria  | Oxalobacteraceae             | Pseudoburkholderia malthae                 | -         | -  |
| B4_U07_E7; E10                    | 99.5-96.6                     | GU377105         | Betaproteobacteria  | Oxalobacteraceae             | Janthinobacterium sp. Sptzw13              | 18        | 2  |
| B4_U07_E1; E3; E13; e3; B4_U09_10 | 99.1-94.5                     | GU134931         | Betaproteobacteria  | Oxalobacteraceae             | bact. enrichment culture clone SBN10       | 19        | 5  |
| B5_U07_06                         | 98.2                          | GU134931         | Betaproteobacteria  | Oxalobacteraceae             | bact. enrichment culture clone SBN15       | 3         | 2  |
| B4_U07_E5; B14_U07_12             | 95.6-94.4                     | GU113051         | Betaproteobacteria  | Oxalobacteraceae             | uncultured bacterium                       | -         | -  |
| B5_U07_01; 11; B4_U07_e1          | 99.8-99.3                     | AB531416         | Betaproteobacteria  | Oxalobacteraceae             | Collimonas sp. III-48                      | 18        | 9  |
| B68_U09_01                        | 99.3                          | EF019243         | Betaproteobacteria  | TRA3-20                      | uncultured bacterium                       | 2         | 4  |
| B14_U07_3a                        | 97.5                          | FR667839         | Betaproteobacteria  | Gallionellaceae/Sideroxydans | uncultured bacterium                       | -         | 6  |
| B4_U07_E11                        | 98.9                          | AJ582038         | Betaproteobacteria  | Gallionellaceae/Sideroxydans | uncultured bacterium                       | 1         | 74 |
| B4_U09_08                         | 99.8                          | AJ582038         | Betaproteobacteria  | Gallionellaceae/Sideroxydans | uncultured bacterium                       | 2         | 76 |
| B38_U07_05                        | 94                            | AB240323         | Betaproteobacteria  | Gallionellaceae              | uncultured bacterium                       | -         | -  |
| B14_U07_04                        | 96.2                          | AB240324         | Betaproteobacteria  | Gallionellaceae              | uncultured bacterium                       | -         | 17 |
| B4_U07_E16                        | 93.3                          | DQ450774         | Betaproteobacteria  | Gallionellaceae              | uncultured bacterium                       | -         | -  |
| B4_U09_04                         | 99.8                          | DQ404614         | Betaproteobacteria  | Nitrosomonadaceae            | uncultured bacterium                       | 5         | 12 |
| B38_U07_06                        | 94.5                          | AJ318189         | Betaproteobacteria  | SC-I-84                      | uncultured bacterium                       | -         | -  |
| B68_U09_20                        | 100                           | Z93442           | Gammaproteobacteria | Moraxellaceae                | Acinetobacter sp.                          | 14        | 16 |
| B38_U07_18                        | 99.8                          | X81662           | Gammaproteobacteria | Moraxellaceae                | Acinetobacter haemolyticus                 | 11        | 14 |
| B5_U07_2f                         | 99.3                          | DQ778036         | Gammaproteobacteria | Pseudomonadaceae             | Pseudomonas sp.AD21                        | 71        | 82 |
| B5_U07_18                         | 100                           | GU569131         | Gammaproteobacteria | Pseudomonadaceae             | uncultured Pseudomonas sp.                 | 63        | 81 |
| B14_U07_13                        | 89.2                          | GU569132         | Gammaproteobacteria | Pseudomonadaceae             | uncultured Pseudomonas sp.                 | -         | -  |
| B5_U07_2b                         | 86.9                          | AY212658         | Gammaproteobacteria | Oceanospirillaceae           | uncultured bacterium                       | -         | -  |
| B55_U09_09                        | 99.8                          | HQ163558         | Gammaproteobacteria | Xanthomonadaceae             | uncultured bacterium                       | 8         | 1  |
| B4_U07_E14                        | 93.3                          | EF018241         | Gammaproteobacteria | Xanthomonadaceae             | uncultured bacterium                       | -         | -  |
| B5_U07_08                         | 94.2                          | EF515987         | Gammaproteobacteria | Xanthomonadaceae             | uncultured bacterium                       | -         | -  |
| B4_U07_E9                         | 99.6                          | EF020306         | Gammaproteobacteria | Xanthomonadaceae             | uncultured bacterium                       | 4         | 2  |
| B38_U07_17                        | 98.7                          | AB240283         | Gammaproteobacteria | Xanthomonadaceae             | uncultured bacterium                       | 4         | 2  |
| B5_U07_12                         | 91.3                          | GU270815         | Deltaproteobacteria | Geobacteraceae               | uncultured bacterium                       | -         | -  |
| B14_U07_05                        | 91.3                          | AY607189         | Deltaproteobacteria | Geobacteraceae               | uncultured Geobacter                       | -         | -  |
| B4_U09_13                         | 97.8                          | FR667779         | Deltaproteobacteria | Geobacteraceae               | uncultured bacterium                       | 9         | 17 |
| B5_U07_09                         | 98.7                          | CP001124         | Deltaproteobacteria | Geobacteraceae               | Geobacter bemidjiensis                     | 10        | 6  |
| B4_U09_01                         | 98.5                          | GQ461663         | Deltaproteobacteria | BVA18                        | uncultured bacterium                       | 4         | 22 |
| B5_U07_15                         | 98.5                          | AJ534630         | Deltaproteobacteria | Sorangineae                  | uncultured bacterium                       | 1         | -  |
| B55_U07_17                        | 97.1                          | EU223957         | Deltaproteobacteria | Nannocystineae               | uncultured bacterium                       | 4         | 2  |
| B38_U07_20                        | 92.4                          | FJ152723         | Deltaproteobacteria | Nannocystineae               | uncultured bacterium                       | -         | -  |
| B55_U09_14                        | 97.3                          | EF515967         | Deltaproteobacteria | Nannocystineae               | uncultured bacterium                       | -         | -  |

|                                |           |          |                     |                        |                                  |    |    |
|--------------------------------|-----------|----------|---------------------|------------------------|----------------------------------|----|----|
| B4_U07_E12                     | 97.5      | FJ466160 | Acidobacteria       | Family Incertae Sedis  | Bryobacter                       | 6  | 1  |
| B4_U09_19                      | 95.2      | EF018402 | Acidobacteria       | Family Incertae Sedis  | Bryobacter                       | -  | -  |
| B5_U07_2e; 2g                  | 99.8-98.5 | HM062295 | Acidobacteria       | Family Incertae Sedis  | Bryobacter                       | 5  | 1  |
| B4_U07_E4                      | 99.2      | HM062295 | Acidobacteria       | Family Incertae Sedis  | Bryobacter                       | 5  | 1  |
| B14_U07_06                     | 95.4      | EF019093 | Acidobacteria       | Family Incertae Sedis  | Bryobacter                       | -  | -  |
| B38_U07_16                     | 86.3      | FJ206864 | Acidobacteria       | Family Incertae Sedis  | uncultured bacterium             | -  | -  |
| B4_U07_EC                      | 91.4      | FM956224 | Acidobacteria       | Family Incertae Sedis  | uncultured bacterium             | -  | -  |
| B55_U07_09                     | 99.8      | GQ339162 | Acidobacteria       | Acidobacteriaceae      | uncultured bacterium             | 3  | 1  |
| B55_U09_06                     | 91.4      | AY963450 | Acidobacteria       | Acidobacteriaceae      | uncultured bacterium             | -  | -  |
| B55_U09_17                     | 99.8      | HM062041 | Acidobacteria       | Acidobacteriaceae      | uncultured bacterium             | 4  | -  |
| B55_U09_18                     | 97.3      | DQ984568 | Acidobacteria       | Acidobacteriaceae      | uncultured bacterium             | -  | -  |
| B4_U07_E8                      | 93.5      | HM062040 | Acidobacteria       | Candidatus Koribacter  | uncultured bacterium             | -  | -  |
| B4_U07_ED                      | 96.6      | EU335297 | Acidobacteria       | Acidobacteriaceae      | uncultured bacterium             | -  | -  |
| B4_U07_EE                      | 99.8      | HM062032 | Acidobacteria       | Acidobacteriaceae      | uncultured bacterium             | 4  | -  |
| B38_U07_11                     | 98.1      | GU172182 | Acidobacteria       | Acidobacteriaceae      | uncultured bacterium             | -  | 2  |
| B38_U07_19                     | 97.5      | DQ984559 | Acidobacteria       | Acidobacteriaceae      | uncultured bacterium             | -  | 2  |
| B5_U07_05                      | 91.7      | EF019141 | Acidobacteria       | Acidobacteriaceae      | uncultured bacterium             | -  | -  |
| B4_U07_e5                      | 88.4      | EU131935 | Acidobacteria       | Candidatus Solibacter  | uncultured bacterium             | -  | -  |
| B5_U07_14; 17                  | 94.8-91   | EF019743 | Acidobacteria       | Candidatus Solibacter  | uncultured bacterium             | -  | -  |
| B4_U09_09                      | 99.4      | AB300097 | Acidobacteria       | Candidatus Solibacter  | uncultured bacterium             | 1  | 3  |
| B4_U07_e2                      | 99.2      | HM061859 | Acidobacteria       | Candidatus Solibacter  | uncultured bacterium             | 1  | 2  |
| B5_U07_07                      | 99.4      | HM062094 | Acidobacteria       | Candidatus Solibacter  | uncultured bacterium             | -  | 2  |
| B55_U07_18                     | 94.7      | HQ114173 | Acidobacteria       | DA023                  | uncultured bacterium             | -  | -  |
| B55_U09_02                     | 99.5      | EU937874 | Acidobacteria       | DA023                  | uncultured bacterium             | 17 | 4  |
| B55_U07_12                     | 99.5      | HM062339 | Acidobacteria       | DA023                  | uncultured bacterium             | -  | -  |
| B55_U09_13; 20                 | 92.3      | EU297423 | Acidobacteria       | DA023                  | uncultured bacterium             | -  | -  |
| B5_U07_03                      | 91.1      | FJ004730 | Acidobacteria       | DA023                  | uncultured bacterium             | -  | -  |
| B38_U07_13                     | 98.5      | HM061965 | Acidobacteria       | DA023                  | uncultured bacterium             | -  | -  |
| B55_U07_13; B4_U09_03          | 98.9-98.7 | FJ466151 | Acidobacteria       | DA052                  | uncultured bacterium             | 2  | -  |
| B55_U07_02; 04; 07; 08; 11; 14 | 99.8-99.1 | EU335357 | Acidobacteria       | DA052                  | uncultured bacterium             | 6  | 2  |
| B55_U09_07; 10; 11             | 99.6-99.1 | EU335357 | Acidobacteria       | DA052                  | uncultured bacterium             | 6  | 2  |
| B55_U06_04; 07                 | 99.6      | EU335357 | Acidobacteria       | DA052                  | uncultured bacterium             | 6  | 2  |
| B55_U09_01                     | 98.3      | FJ004659 | Acidobacteria       | DA052                  | uncultured bacterium             | -  | -  |
| B55_U07_01                     | 99.1      | DQ451504 | Acidobacteria       | DA052                  | uncultured bacterium             | 5  | 2  |
| B55_U07_16                     | 98.9      | EU680444 | Acidobacteria       | DA052                  | uncultured bacterium             | 7  | 2  |
| B55_U07_19                     | 99.6      | EF018280 | Acidobacteria       | DA052                  | uncultured bacterium             | 6  | 2  |
| B4_U07_EB                      | 98.9      | AJ519390 | Acidobacteria       | KF-JG30-18             | uncultured Holophaga             | 6  | -  |
| B55_U07_05                     | 95.3      | AY395328 | Acidobacteria       | 32-20                  | uncultured bacterium             | -  | -  |
| B38_U07_08                     | 97.6      | GQ406202 | Acidobacteria       | Holophagaceae          | uncultured bacterium             | -  | 1  |
| B14_U07_3c                     | 93        | GQ406202 | Acidobacteria       | Holophagaceae          | uncultured bacterium             | -  | -  |
| B4_U09_02; 16                  | 99.1-98.2 | GQ342323 | Acidobacteria       | Holophagaceae/Geothrix | uncultured bacterium             | 8  | 4  |
| B14_U07_16                     | 98.7      | GQ342323 | Acidobacteria       | Holophagaceae/Geothrix | uncultured bacterium             | 8  | 6  |
| B5_U07_16                      | 90.8      | GU205678 | Acidobacteria       | Holophagaceae          | uncultured bacterium             | -  | -  |
| B55_U07_06; 10; 20             | 93.7-96   | EF018221 | Chloroflexi         | Ktedonobacterales      | uncultured bacterium             | -  | -  |
| B38_U07_12                     | 98.3      | EU680443 | Chloroflexi         | Ktedonobacterales      | uncultured bacterium             | 17 | 4  |
| B5_U07_02                      | 91.3      | EU680443 | Chloroflexi         | Ktedonobacterales      | uncultured bacterium             | -  | -  |
| B5_U07_2d                      | 92.8      | DQ125834 | Chloroflexi         | Ktedonobacterales      | uncultured bacterium             | -  | -  |
| B4_U07_E2; B55_U07_15          | 99-98.9   | EF516939 | Chloroflexi         | 1921-3                 | uncultured bacterium             | -  | -  |
| B38_U07_10                     | 88.5      | AB109437 | Chloroflexi         | Anaerolineaceae        | Anaerolinea thermolisa           | -  | -  |
| B55_U09_03                     | 95.1      | EF018077 | Chloroflexi         | JG37-AG-4              | uncultured bacterium             | -  | -  |
| B14_U07_07                     | 100       | EF516345 | Chloroflexi         | JG37-AG-4              | uncultured bacterium             | 3  | -  |
| B68_U09_03; 12; 18             | 100-99.6  | HM059721 | Firmicutes          | Bacillaceae            | Geobacillus sp.                  | -  | -  |
| B4_U07_E15                     | 99.4      | EU266788 | Nitrospirae         | Nitrospiraceae         | uncultured Nitrospirae bacterium | 5  | 12 |
| B38_U07_14                     | 98.7      | DQ450808 | Nitrospirae         | 4_29                   | uncultured Nitrospirae bacterium | 1  | 3  |
| B55_U06_17                     | 100       | HQ113217 | Actinobacteria      | Microbacteriaceae      | Microbacterium paraoxydans       | 17 | 4  |
| B14_U07_17                     | 90        | GQ358825 | Deinococcus-Thermus | Deinococcaceae         | uncultured bacterium             | -  | -  |
| B55_U09_15                     | 97.8      | GQ402722 | Elusimicrobia       | Lineage IV             | uncultured bacterium             | -  | -  |
| B5_U07_2a                      | 99.5      | AM162457 | Verrucomicrobia     | OPB35 soil group       | uncultured bacterium             | -  | -  |
